# Supplementary figures and images for: Improving children's nutritional status in Cambodia: Multidimensional poverty and early integrated interventions
Source: PubMed Central journal article supplement — Matern Child Nutr. 2020 Jul 4;16(Suppl 2):e12731. doi: 10.1111/mcn.12731 (PMC7591312; doi:10.1111/mcn.12731), 2020-07-04

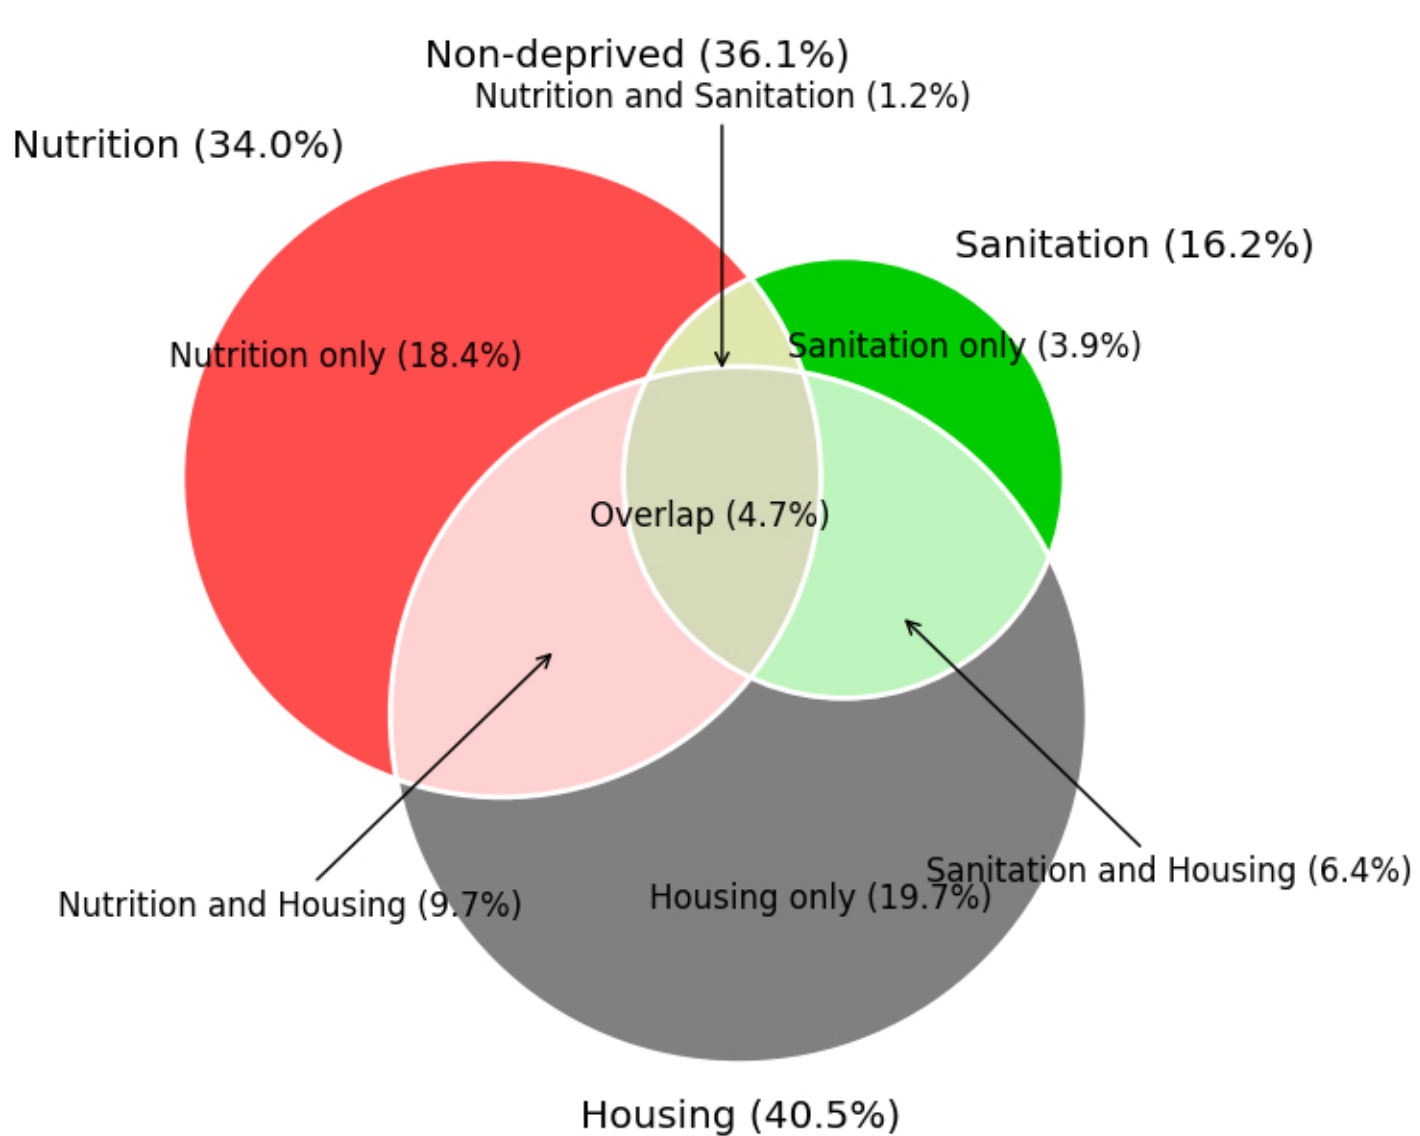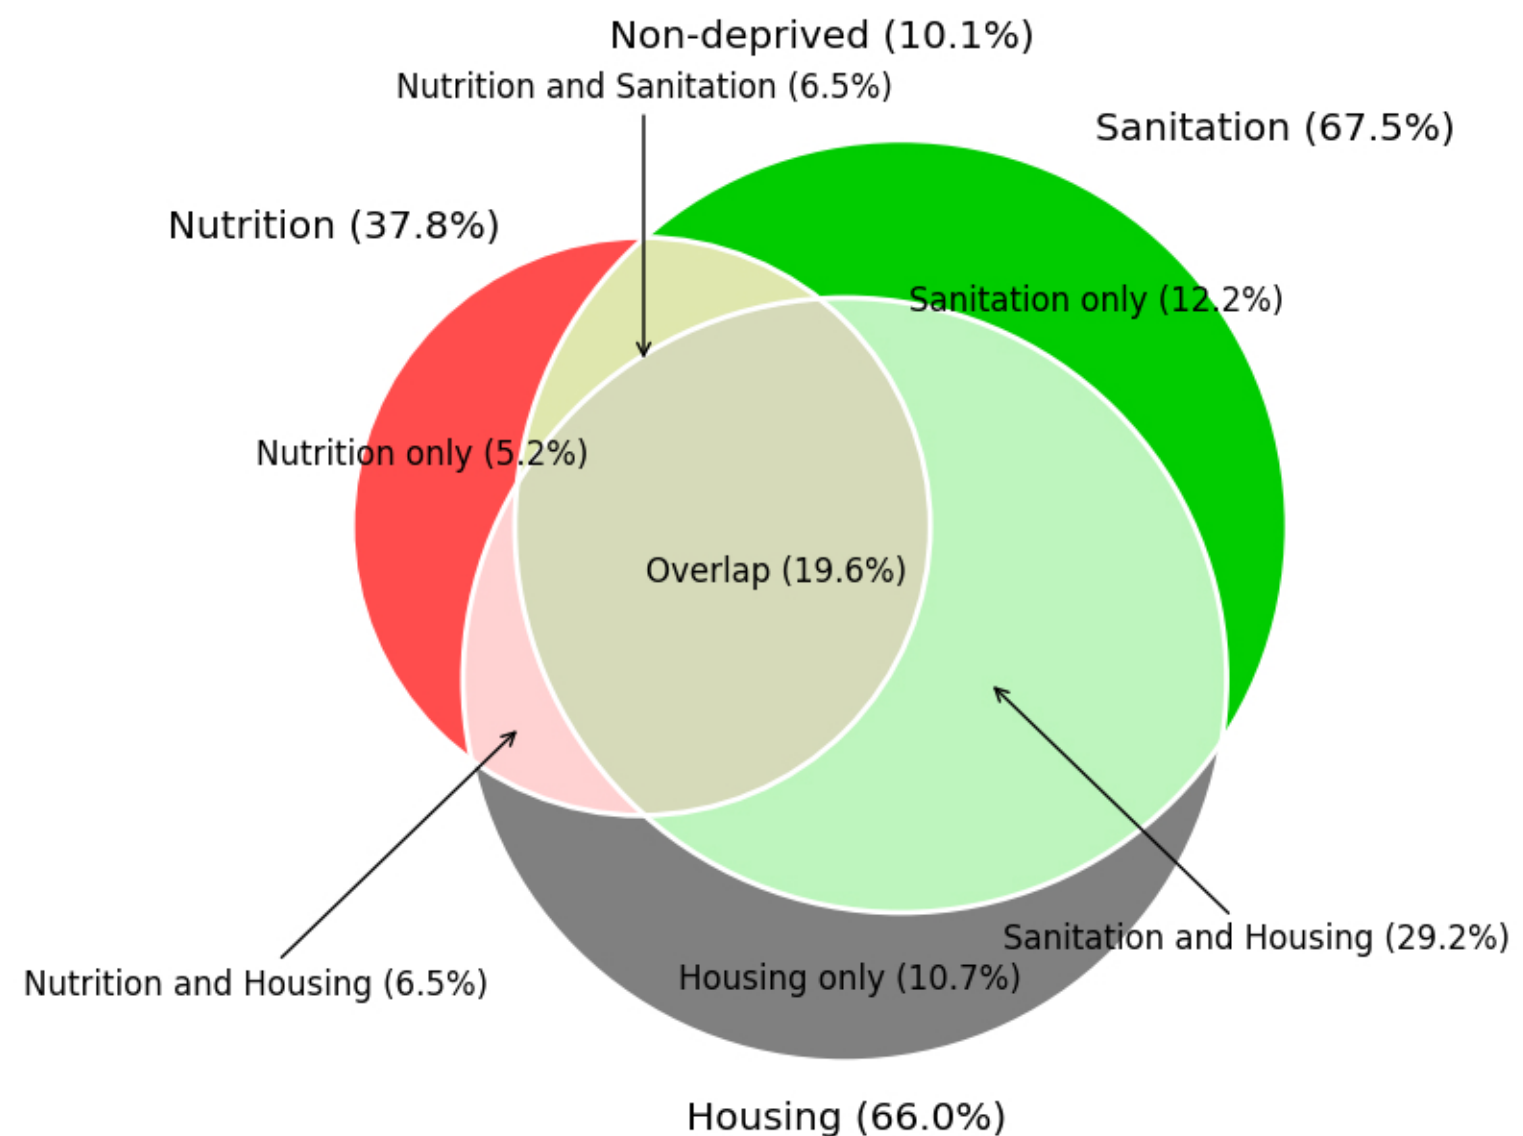

Supplement: MCN-16-e12731-s001.pdf [file MCN-16-e12731-s001.pdf]

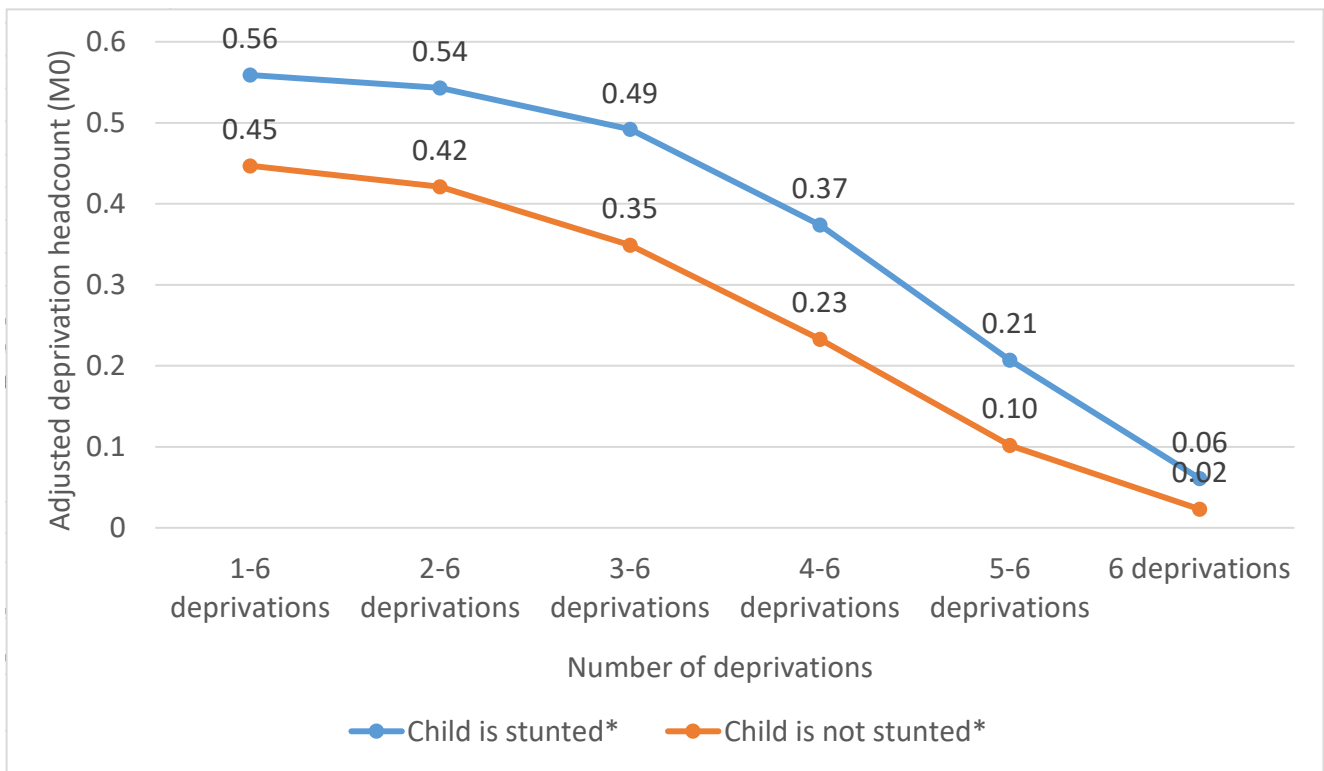

Supplement: MCN-16-e12731-s003.pdf [file MCN-16-e12731-s003.pdf]

Non-deprived (33.2%)

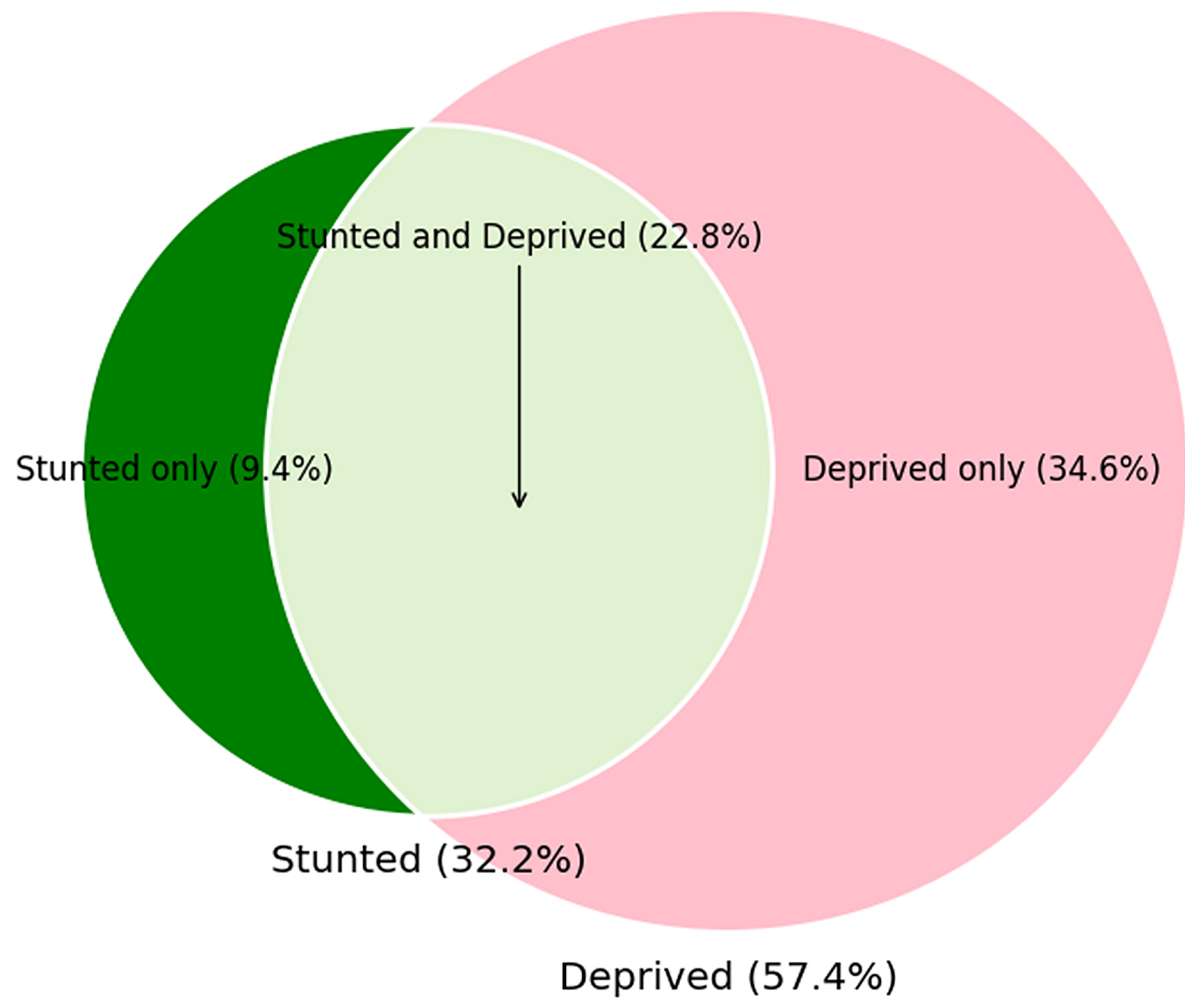

Stunted and Deprived (22.8%)

Stunted only (9.4%)

Deprived only (34.6%)

Stunted (32.2%)

Deprived (57.4%)

Supplement: MCN-16-e12731-s004.pdf [file MCN-16-e12731-s004.pdf]
